# Supplementary material for: Short-Term Panax Ginseng Extract Supplementation Reduces Fasting Blood Triacylglycerides and Oxygen Consumption during Sub-Maximal Aerobic Exercise in Male Recreational Athletes
Source: MDPI journal article supplement (doi:10.3390/biom14050533), 2024-04-30
Supplement: s1 [file s1]

## Supplementary files

### **Short-term Panax Ginseng extract supplementation reduces fasting blood triacylglycerides and oxygen consumption during sub-maximal aerobic exercise in male recreational athletes.**

**Didier Hernández-García<sup>1</sup>, Ana Belén Granado-Serrano<sup>1</sup>, Meritxell Martín-Gari<sup>1</sup>, Assumpta Ensenyat<sup>2</sup>, Alba Naudí<sup>1</sup>, and Jose CE Serrano<sup>1,\*</sup>**

<sup>1</sup> NUTREN-Nutrigenomics, Department of Experimental Medicine, Universitat de Lleida, Lleida, Spain

<sup>2</sup> Institut Nacional d'Educació Física de Catalunya, Lleida, Spain.

\* Correspondence: josecarlos.serrano@udl.cat; Tel.: +34 973702408

Table S1. Two-way ANOVA statistical analysis results for treatment effect of volunteer's demographic, training, and nutritional parameters.

| Parameter                              | F     | p-value | Partial eta squared |
|----------------------------------------|-------|---------|---------------------|
| <b>A. 10 km races</b>                  |       |         |                     |
| Body weight                            | 1.083 | 0.3025  | 0.0183              |
| <i>Training parameters</i>             |       |         |                     |
| Km/week                                | 6.569 | 0.0130  | 0.1017              |
| min/week                               | 1.948 | 0.1681  | 0.0325              |
| <i>Nutritional parameters</i>          |       |         |                     |
| Energy                                 | 1.976 | 0.1652  | 0.0329              |
| Carbohydrates                          | 14.17 | 0.0004  | 0.1963              |
| Protein                                | 1.061 | 0.3072  | 0.0180              |
| Lipids                                 | 0.667 | 0.4176  | 0.0114              |
| <b>B. Sub-maximal performance test</b> |       |         |                     |
| Body weight                            | 3.503 | 0.0694  | 0.0884              |
| <i>Training parameters</i>             |       |         |                     |
| Km/week                                | 6.502 | 0.0152  | 0.1529              |
| min/week                               | 0.007 | 0.9353  | 0.0002              |
| <i>Nutritional parameters</i>          |       |         |                     |
| Energy                                 | 5.217 | 0.0284  | 0.1266              |
| Carbohydrates                          | 4.682 | 0.0372  | 0.1151              |
| Protein                                | 3.679 | 0.0631  | 0.0927              |
| Lipids                                 | 0.712 | 0.4042  | 0.0194              |

Table S2. Two-way ANOVA statistical analysis results for time, blood and perceived effort parameters of volunteer's 10 km races.

| Parameter                                                    | F      | p-value | Partial eta squared |
|--------------------------------------------------------------|--------|---------|---------------------|
| <b>A. Race time</b>                                          |        |         |                     |
| Time (1 <sup>st</sup> race vs 2 <sup>nd</sup> race)          | 33.87  | <0.0001 | 0.5387              |
| Treatment (Placebo vs PG)                                    | 1.721  | 0.1999  | 0.7853              |
| Multiple comparison                                          |        |         |                     |
| Placebo (1 <sup>st</sup> race vs 2 <sup>nd</sup> race)       |        | <0.0001 |                     |
| Panax ginseng (1 <sup>st</sup> race vs 2 <sup>nd</sup> race) |        | 0.0020  |                     |
| First race (Placebo vs PG)                                   |        | 0.1615  |                     |
| Second race (Placebo vs PG)                                  |        | 0.2412  |                     |
| <b>B. Borg's CR-10</b>                                       |        |         |                     |
| Time (1 <sup>st</sup> race vs 2 <sup>nd</sup> race)          | 4.899  | 0.0349  | 0.1445              |
| Treatment (Placebo vs PG)                                    | 0.5630 | 0.4591  | 0.0680              |
| Multiple comparison                                          |        |         |                     |
| Placebo (1 <sup>st</sup> race vs 2 <sup>nd</sup> race)       |        | 0.6459  |                     |
| Panax ginseng (1 <sup>st</sup> race vs 2 <sup>nd</sup> race) |        | 0.3870  |                     |
| First race (Placebo vs PG)                                   |        | 0.2142  |                     |
| Second race (Placebo vs PG)                                  |        | 0.0743  |                     |
| <b>C. Total lipids</b>                                       |        |         |                     |
| <i>Before 10 km race</i>                                     |        |         |                     |
| Time (1 <sup>st</sup> race vs 2 <sup>nd</sup> race)          | 0.0823 | 0.7745  | 0.0029              |
| Treatment (Placebo vs PG)                                    | 2.033  | 0.1646  | 0.3289              |
| Multiple comparison                                          |        |         |                     |
| Placebo (1 <sup>st</sup> race vs 2 <sup>nd</sup> race)       |        | 0.0412  |                     |
| Panax ginseng (1 <sup>st</sup> race vs 2 <sup>nd</sup> race) |        | 0.0196  |                     |
| First race (Placebo vs PG)                                   |        | 0.8580  |                     |
| Second race (Placebo vs PG)                                  |        | 0.0158  |                     |
| <i>After 10 km race</i>                                      |        |         |                     |
| Time (1 <sup>st</sup> race vs 2 <sup>nd</sup> race)          | 2.622  | 0.1162  | 0.0829              |
| Treatment (Placebo vs PG)                                    | 0.1195 | 0.7321  | 0.0315              |
| Multiple comparison                                          |        |         |                     |
| Placebo (1 <sup>st</sup> race vs 2 <sup>nd</sup> race)       |        | 0.2610  |                     |
| Panax ginseng (1 <sup>st</sup> race vs 2 <sup>nd</sup> race) |        | 0.2621  |                     |
| First race (Placebo vs PG)                                   |        | 0.7520  |                     |
| Second race (Placebo vs PG)                                  |        | 0.7398  |                     |
| <i>Placebo</i>                                               |        |         |                     |
| Time (Pre – post race)                                       | 30.21  | <0.0001 | 0.5017              |
| 10 km race (1 <sup>st</sup> vs 2 <sup>nd</sup> race)         | 0.8925 | 0.3523  | 0.1551              |
| Multiple comparison                                          |        |         |                     |
| Pre-race (1 <sup>st</sup> race vs 2 <sup>nd</sup> race)      |        | 0.4713  |                     |
| Post-race (1 <sup>st</sup> race vs 2 <sup>nd</sup> race)     |        | 0.7703  |                     |
| Pre-post race (1 <sup>st</sup> race)                         |        | 0.0003  |                     |
| Pre-post race (2 <sup>nd</sup> race)                         |        | 0.0034  |                     |
| <i>Panax ginseng</i>                                         |        |         |                     |
| Time (Pre – post race)                                       | 72.03  | <0.0001 | 0.7201              |
| 10 km race (1 <sup>st</sup> vs 2 <sup>nd</sup> race)         | 0.0772 | 0.7832  | 0.0184              |
| Multiple comparison                                          |        |         |                     |

|                                                              |        |         |        |
|--------------------------------------------------------------|--------|---------|--------|
| Pre-race (1 <sup>st</sup> race vs 2 <sup>nd</sup> race)      |        | 0.3005  |        |
| Post-race (1 <sup>st</sup> race vs 2 <sup>nd</sup> race)     |        | 0.6005  |        |
| Pre-post race (1 <sup>st</sup> race)                         |        | 0.0001  |        |
| Pre-post race (2 <sup>nd</sup> race)                         |        | <0.0001 |        |
|                                                              |        |         |        |
| <b>D. Phospholipids</b>                                      |        |         |        |
| <i>Before 10 km race</i>                                     |        |         |        |
| Time (1 <sup>st</sup> race vs 2 <sup>nd</sup> race)          | 2.300  | 0.1348  | 0.0381 |
| Treatment (Placebo vs PG)                                    | 12.52  | 0.0008  | 0.1776 |
| Multiple comparison                                          |        |         |        |
| Placebo (1 <sup>st</sup> race vs 2 <sup>nd</sup> race)       |        | <0.0001 |        |
| Panax ginseng (1 <sup>st</sup> race vs 2 <sup>nd</sup> race) |        | 0.4775  |        |
| First race (Placebo vs PG)                                   |        | 0.0333  |        |
| Second race (Placebo vs PG)                                  |        | <0.0001 |        |
|                                                              |        |         |        |
| <i>After 10 km race</i>                                      |        |         |        |
| Time (1 <sup>st</sup> race vs 2 <sup>nd</sup> race)          | 0.1702 | 0.6814  | 0.0029 |
| Treatment (Placebo vs PG)                                    | 2.289  | 0.1357  | 0.0380 |
| Multiple comparison                                          |        |         |        |
| Placebo (1 <sup>st</sup> race vs 2 <sup>nd</sup> race)       |        | 0.4322  |        |
| Panax ginseng (1 <sup>st</sup> race vs 2 <sup>nd</sup> race) |        | 0.1854  |        |
| First race (Placebo vs PG)                                   |        | 0.0366  |        |
| Second race (Placebo vs PG)                                  |        | >0.9999 |        |
|                                                              |        |         |        |
| <i>Placebo</i>                                               |        |         |        |
| Time (Pre – post race)                                       | 6.093  | 0.0164  | 0.0922 |
| 10 km race (1 <sup>st</sup> vs 2 <sup>nd</sup> race)         | 0.3245 | 0.5711  | 0.0054 |
| Multiple comparison                                          |        |         |        |
| Pre-race (1 <sup>st</sup> race vs 2 <sup>nd</sup> race)      |        | 0.2871  |        |
| Post-race (1 <sup>st</sup> race vs 2 <sup>nd</sup> race)     |        | 0.7892  |        |
| Pre-post race (1 <sup>st</sup> race)                         |        | 0.0187  |        |
| Pre-post race (2 <sup>nd</sup> race)                         |        | 0.2871  |        |
|                                                              |        |         |        |
| <i>Panax ginseng</i>                                         |        |         |        |
| Time (Pre – post race)                                       | 10.00  | 0.0025  | 0.1516 |
| 10 km race (1 <sup>st</sup> vs 2 <sup>nd</sup> race)         | 0.7844 | 0.3796  | 0.0138 |
| Multiple comparison                                          |        |         |        |
| Pre-race (1 <sup>st</sup> race vs 2 <sup>nd</sup> race)      |        | 0.1129  |        |
| Post-race (1 <sup>st</sup> race vs 2 <sup>nd</sup> race)     |        | 0.7218  |        |
| Pre-post race (1 <sup>st</sup> race)                         |        | 0.0021  |        |
| Pre-post race (2 <sup>nd</sup> race)                         |        | 0.2156  |        |
|                                                              |        |         |        |
| <b>E. Total cholesterol</b>                                  |        |         |        |
| <i>Before 10 km race</i>                                     |        |         |        |
| Time (1 <sup>st</sup> race vs 2 <sup>nd</sup> race)          | 0.0435 | 0.8362  | 0.0015 |
| Treatment (Placebo vs PG)                                    | 1.850  | 0.1843  | 0.2214 |
| Multiple comparison                                          |        |         |        |
| Placebo (1 <sup>st</sup> race vs 2 <sup>nd</sup> race)       |        | 0.2374  |        |
| Panax ginseng (1 <sup>st</sup> race vs 2 <sup>nd</sup> race) |        | 0.3874  |        |
| First race (Placebo vs PG)                                   |        | 0.5507  |        |
| Second race (Placebo vs PG)                                  |        | 0.0682  |        |
|                                                              |        |         |        |
| <i>After 10 km race</i>                                      |        |         |        |
| Time (1 <sup>st</sup> race vs 2 <sup>nd</sup> race)          | 2.143  | 0.1540  | 0.0688 |
| Treatment (Placebo vs PG)                                    | 0.6278 | 0.4346  | 0.1946 |

|                                                              |         |        |        |
|--------------------------------------------------------------|---------|--------|--------|
| Multiple comparison                                          |         |        |        |
| Placebo (1 <sup>st</sup> race vs 2 <sup>nd</sup> race)       |         | 0.3014 |        |
| Panax ginseng (1 <sup>st</sup> race vs 2 <sup>nd</sup> race) |         | 0.3167 |        |
| First race (Placebo vs PG)                                   |         | 0.4509 |        |
| Second race (Placebo vs PG)                                  |         | 0.4509 |        |
|                                                              |         |        |        |
| <i>Placebo</i>                                               |         |        |        |
| Time (Pre – post race)                                       | 1.976   | 0.1701 | 0.0618 |
| 10 km race (1 <sup>st</sup> vs 2 <sup>nd</sup> race)         | 0.3672  | 0.5491 | 0.1056 |
| Multiple comparison                                          |         |        |        |
| Pre-race (1 <sup>st</sup> race vs 2 <sup>nd</sup> race)      |         | 0.4619 |        |
| Post-race (1 <sup>st</sup> race vs 2 <sup>nd</sup> race)     |         | 0.6810 |        |
| Pre-post race (1 <sup>st</sup> race)                         |         | 0.5423 |        |
| Pre-post race (2 <sup>nd</sup> race)                         |         | 0.1804 |        |
|                                                              |         |        |        |
| <i>Panax ginseng</i>                                         |         |        |        |
| Time (Pre – post race)                                       | 0.0756  | 0.7854 | 0.0027 |
| 10 km race (1 <sup>st</sup> vs 2 <sup>nd</sup> race)         | 0.0055  | 0.9411 | 0.0017 |
| Multiple comparison                                          |         |        |        |
| Pre-race (1 <sup>st</sup> race vs 2 <sup>nd</sup> race)      |         | 0.5855 |        |
| Post-race (1 <sup>st</sup> race vs 2 <sup>nd</sup> race)     |         | 0.6853 |        |
| Pre-post race (1 <sup>st</sup> race)                         |         | 0.3950 |        |
| Pre-post race (2 <sup>nd</sup> race)                         |         | 0.2207 |        |
|                                                              |         |        |        |
| <b>F. Triacylglycerides</b>                                  |         |        |        |
| <i>Before 10 km race</i>                                     |         |        |        |
| Time (1 <sup>st</sup> race vs 2 <sup>nd</sup> race)          | 0.0641  | 0.8018 | 0.0022 |
| Treatment (Placebo vs PG)                                    | 5.452   | 0.0267 | 0.4193 |
| Multiple comparison                                          |         |        |        |
| Placebo (1 <sup>st</sup> race vs 2 <sup>nd</sup> race)       |         | 0.8023 |        |
| Panax ginseng (1 <sup>st</sup> race vs 2 <sup>nd</sup> race) |         | 0.5550 |        |
| First race (Placebo vs PG)                                   |         | 0.0763 |        |
| Second race (Placebo vs PG)                                  |         | 0.0219 |        |
|                                                              |         |        |        |
| <i>After 10 km race</i>                                      | 4.257   | 0.0481 | 0.8098 |
| Time (1 <sup>st</sup> race vs 2 <sup>nd</sup> race)          | 5.009   | 0.0331 | 0.9240 |
| Treatment (Placebo vs PG)                                    |         |        |        |
| Multiple comparison                                          |         |        |        |
| Placebo (1 <sup>st</sup> race vs 2 <sup>nd</sup> race)       |         | 0.0350 |        |
| Panax ginseng (1 <sup>st</sup> race vs 2 <sup>nd</sup> race) |         | 0.4713 |        |
| First race (Placebo vs PG)                                   |         | 0.0181 |        |
| Second race (Placebo vs PG)                                  |         | 0.1868 |        |
|                                                              |         |        |        |
| <i>Placebo</i>                                               |         |        |        |
| Time (Pre – post race)                                       | 0.6121  | 0.4401 | 0.0200 |
| 10 km race (1 <sup>st</sup> vs 2 <sup>nd</sup> race)         | 0.5984  | 0.4453 | 0.0834 |
| Multiple comparison                                          |         |        |        |
| Pre-race (1 <sup>st</sup> race vs 2 <sup>nd</sup> race)      |         | 0.9041 |        |
| Post-race (1 <sup>st</sup> race vs 2 <sup>nd</sup> race)     |         | 0.1332 |        |
| Pre-post race (1 <sup>st</sup> race)                         |         | 0.0640 |        |
| Pre-post race (2 <sup>nd</sup> race)                         |         | 0.4206 |        |
|                                                              |         |        |        |
| <i>Panax ginseng</i>                                         |         |        |        |
| Time (Pre – post race)                                       | 0.5383  | 0.4693 | 0.0189 |
| 10 km race (1 <sup>st</sup> vs 2 <sup>nd</sup> race)         | 0.54278 | 0.4674 | 0.0870 |

|                                                              |        |        |        |
|--------------------------------------------------------------|--------|--------|--------|
| Multiple comparison                                          |        |        |        |
| Pre-race (1 <sup>st</sup> race vs 2 <sup>nd</sup> race)      |        | 0.6278 |        |
| Post-race (1 <sup>st</sup> race vs 2 <sup>nd</sup> race)     |        | 0.3959 |        |
| Pre-post race (1 <sup>st</sup> race)                         |        | 0.4107 |        |
| Pre-post race (2 <sup>nd</sup> race)                         |        | 0.8411 |        |
|                                                              |        |        |        |
| <b>G. Non-esterified fatty acids</b>                         |        |        |        |
| <i>Before 10 km race</i>                                     |        |        |        |
| Time (1 <sup>st</sup> race vs 2 <sup>nd</sup> race)          | 0.4456 | 0.5103 | 0.0169 |
| Treatment (Placebo vs PG)                                    | 3.294  | 0.0811 | 0.2035 |
| Multiple comparison                                          |        |        |        |
| Placebo (1 <sup>st</sup> race vs 2 <sup>nd</sup> race)       |        | 0.3026 |        |
| Panax ginseng (1 <sup>st</sup> race vs 2 <sup>nd</sup> race) |        | 0.9470 |        |
| First race (Placebo vs PG)                                   |        | 0.0597 |        |
| Second race (Placebo vs PG)                                  |        | 0.3018 |        |
|                                                              |        |        |        |
| <i>After 10 km race</i>                                      |        |        |        |
| Time (1 <sup>st</sup> race vs 2 <sup>nd</sup> race)          | 0.2038 | 0.6550 | 0.0070 |
| Treatment (Placebo vs PG)                                    | 1.899  | 0.1787 | 0.0839 |
| Multiple comparison                                          |        |        |        |
| Placebo (1 <sup>st</sup> race vs 2 <sup>nd</sup> race)       |        | 0.9898 |        |
| Panax ginseng (1 <sup>st</sup> race vs 2 <sup>nd</sup> race) |        | 0.5267 |        |
| First race (Placebo vs PG)                                   |        | 0.1806 |        |
| Second race (Placebo vs PG)                                  |        | 0.4568 |        |
|                                                              |        |        |        |
| <i>Placebo</i>                                               |        |        |        |
| Time (Pre – post race)                                       | 0.2287 | 0.6362 | 0.0081 |
| 10 km race (1 <sup>st</sup> vs 2 <sup>nd</sup> race)         | 0.3997 | 0.5324 | 0.0435 |
| Multiple comparison                                          |        |        |        |
| Pre-race (1 <sup>st</sup> race vs 2 <sup>nd</sup> race)      |        | 0.4448 |        |
| Post-race (1 <sup>st</sup> race vs 2 <sup>nd</sup> race)     |        | 0.7398 |        |
| Pre-post race (1 <sup>st</sup> race)                         |        | 0.5188 |        |
| Pre-post race (2 <sup>nd</sup> race)                         |        | 0.9819 |        |
|                                                              |        |        |        |
| <i>Panax ginseng</i>                                         |        |        |        |
| Time (Pre – post race)                                       | 0.0151 | 0.9032 | 0.0006 |
| 10 km race (1 <sup>st</sup> vs 2 <sup>nd</sup> race)         | 0.2743 | 0.6053 | 0.0147 |
| Multiple comparison                                          |        |        |        |
| Pre-race (1 <sup>st</sup> race vs 2 <sup>nd</sup> race)      |        | 0.9453 |        |
| Post-race (1 <sup>st</sup> race vs 2 <sup>nd</sup> race)     |        | 0.4754 |        |
| Pre-post race (1 <sup>st</sup> race)                         |        | 0.6666 |        |
| Pre-post race (2 <sup>nd</sup> race)                         |        | 0.7954 |        |
|                                                              |        |        |        |
| <b>H. Lactate</b>                                            |        |        |        |
| <i>Before 10 km race</i>                                     |        |        |        |
| Time (1 <sup>st</sup> race vs 2 <sup>nd</sup> race)          | 3.451  | 0.0746 | 0.1172 |
| Treatment (Placebo vs PG)                                    | 0.1673 | 0.6859 | 0.0093 |
| Multiple comparison                                          |        |        |        |
| Placebo (1 <sup>st</sup> race vs 2 <sup>nd</sup> race)       |        | 0.1860 |        |
| Panax ginseng (1 <sup>st</sup> race vs 2 <sup>nd</sup> race) |        | 0.2142 |        |
| First race (Placebo vs PG)                                   |        | 0.7573 |        |
| Second race (Placebo vs PG)                                  |        | 0.7512 |        |
|                                                              |        |        |        |
| <i>After 10 km race</i>                                      |        |        |        |
| Time (1 <sup>st</sup> race vs 2 <sup>nd</sup> race)          | 1.278  | 0.2685 | 0.0469 |

|                                                              |        |         |        |
|--------------------------------------------------------------|--------|---------|--------|
| Treatment (Placebo vs PG)                                    | 10.12  | 0.0038  | 0.5482 |
| Multiple comparison                                          |        |         |        |
| Placebo (1 <sup>st</sup> race vs 2 <sup>nd</sup> race)       |        | 0.8209  |        |
| Panax ginseng (1 <sup>st</sup> race vs 2 <sup>nd</sup> race) |        | 0.1944  |        |
| First race (Placebo vs PG)                                   |        | 0.0025  |        |
| Second race (Placebo vs PG)                                  |        | 0.0218  |        |
|                                                              |        |         |        |
| <i>Placebo</i>                                               |        |         |        |
| Time (Pre – post race)                                       | 45.57  | <0.0001 | 0.6194 |
| 10 km race (1 <sup>st</sup> vs 2 <sup>nd</sup> race)         | 0.7375 | 0.3977  | 0.0185 |
| Multiple comparison                                          |        |         |        |
| Pre-race (1 <sup>st</sup> race vs 2 <sup>nd</sup> race)      |        | 0.4623  |        |
| Post-race (1 <sup>st</sup> race vs 2 <sup>nd</sup> race)     |        | 0.7139  |        |
| Pre-post race (1 <sup>st</sup> race)                         |        | <0.0001 |        |
| Pre-post race (2 <sup>nd</sup> race)                         |        | <0.0001 |        |
|                                                              |        |         |        |
| <i>Panax ginseng</i>                                         |        |         |        |
| Time (Pre – post race)                                       | 51.54  | <0.0001 | 0.6823 |
| 10 km race (1 <sup>st</sup> vs 2 <sup>nd</sup> race)         | 0.7757 | 0.3872  | 0.0336 |
| Multiple comparison                                          |        |         |        |
| Pre-race (1 <sup>st</sup> race vs 2 <sup>nd</sup> race)      |        | 0.7582  |        |
| Post-race (1 <sup>st</sup> race vs 2 <sup>nd</sup> race)     |        | 0.3428  |        |
| Pre-post race (1 <sup>st</sup> race)                         |        | <0.0001 |        |
| Pre-post race (2 <sup>nd</sup> race)                         |        | <0.0001 |        |
|                                                              |        |         |        |
| <b>I. IL-1Ra</b>                                             |        |         |        |
| <i>Before 10 km race</i>                                     |        |         |        |
| Time (1 <sup>st</sup> race vs 2 <sup>nd</sup> race)          | 0.1260 | 0.7252  | 0.0043 |
| Treatment (Placebo vs PG)                                    | 0.1151 | 0.7369  | 0.0152 |
| Multiple comparison                                          |        |         |        |
| Placebo (1 <sup>st</sup> race vs 2 <sup>nd</sup> race)       |        | 0.4755  |        |
| Panax ginseng (1 <sup>st</sup> race vs 2 <sup>nd</sup> race) |        | 0.2422  |        |
| First race (Placebo vs PG)                                   |        | 0.3623  |        |
| Second race (Placebo vs PG)                                  |        | 0.7552  |        |
|                                                              |        |         |        |
| <i>After 10 km race</i>                                      |        |         |        |
| Time (1 <sup>st</sup> race vs 2 <sup>nd</sup> race)          | 0.0133 | 0.9087  | 0.0005 |
| Treatment (Placebo vs PG)                                    | 0.3404 | 0.5641  | 0.0968 |
| Multiple comparison                                          |        |         |        |
| Placebo (1 <sup>st</sup> race vs 2 <sup>nd</sup> race)       |        | 0.7556  |        |
| Panax ginseng (1 <sup>st</sup> race vs 2 <sup>nd</sup> race) |        | 0.6452  |        |
| First race (Placebo vs PG)                                   |        | 0.4698  |        |
| Second race (Placebo vs PG)                                  |        | 0.7052  |        |
|                                                              |        |         |        |
| <i>Placebo</i>                                               |        |         |        |
| Time (Pre – post race)                                       | 0.1504 | 0.7009  | 0.0050 |
| 10 km race (1 <sup>st</sup> vs 2 <sup>nd</sup> race)         | 0.3722 | 0.5464  | 0.0296 |
| Multiple comparison                                          |        |         |        |
| Pre-race (1 <sup>st</sup> race vs 2 <sup>nd</sup> race)      |        | 0.4483  |        |
| Post-race (1 <sup>st</sup> race vs 2 <sup>nd</sup> race)     |        | 0.7915  |        |
| Pre-post race (1 <sup>st</sup> race)                         |        | 0.5521  |        |
| Pre-post race (2 <sup>nd</sup> race)                         |        | 0.9581  |        |
|                                                              |        |         |        |
| <i>Panax ginseng</i>                                         |        |         |        |
| Time (Pre – post race)                                       | 1.221  | 0.2786  | 0.0418 |

|                                                              |        |         |        |
|--------------------------------------------------------------|--------|---------|--------|
| 10 km race (1 <sup>st</sup> vs 2 <sup>nd</sup> race)         | 0.1358 | 0.7153  | 0.0506 |
| Multiple comparison                                          |        |         |        |
| Pre-race (1 <sup>st</sup> race vs 2 <sup>nd</sup> race)      |        | 0.5928  |        |
| Post-race (1 <sup>st</sup> race vs 2 <sup>nd</sup> race)     |        | 0.8674  |        |
| Pre-post race (1 <sup>st</sup> race)                         |        | 0.7453  |        |
| Pre-post race (2 <sup>nd</sup> race)                         |        | 0.2272  |        |
|                                                              |        |         |        |
| <b>J. IL-6</b>                                               |        |         |        |
| <i>Before 10 km race</i>                                     |        |         |        |
| Time (1 <sup>st</sup> race vs 2 <sup>nd</sup> race)          | 9.398  | 0.0033  | 0.1394 |
| Treatment (Placebo vs PG)                                    | 60.71  | <0.0001 | 0.5115 |
| Multiple comparison                                          |        |         |        |
| Placebo (1 <sup>st</sup> race vs 2 <sup>nd</sup> race)       |        | <0.0001 |        |
| Panax ginseng (1 <sup>st</sup> race vs 2 <sup>nd</sup> race) |        | 0.2183  |        |
| First race (Placebo vs PG)                                   |        | <0.0001 |        |
| Second race (Placebo vs PG)                                  |        | 0.0422  |        |
|                                                              |        |         |        |
| <i>After 10 km race</i>                                      |        |         |        |
| Time (1 <sup>st</sup> race vs 2 <sup>nd</sup> race)          | 10.19  | 0.0023  | 0.1494 |
| Treatment (Placebo vs PG)                                    | 19.97  | <0.0001 | 0.2561 |
| Multiple comparison                                          |        |         |        |
| Placebo (1 <sup>st</sup> race vs 2 <sup>nd</sup> race)       |        | 0.0024  |        |
| Panax ginseng (1 <sup>st</sup> race vs 2 <sup>nd</sup> race) |        | 0.1749  |        |
| First race (Placebo vs PG)                                   |        | 0.0002  |        |
| Second race (Placebo vs PG)                                  |        | 0.0252  |        |
|                                                              |        |         |        |
| <i>Placebo</i>                                               |        |         |        |
| Time (Pre – post race)                                       | 29.64  | <0.0001 | 0.3306 |
| 10 km race (1 <sup>st</sup> vs 2 <sup>nd</sup> race)         | 2.324  | 0.1327  | 0.0373 |
| Multiple comparison                                          |        |         |        |
| Pre-race (1 <sup>st</sup> race vs 2 <sup>nd</sup> race)      |        | 0.8781  |        |
| Post-race (1 <sup>st</sup> race vs 2 <sup>nd</sup> race)     |        | 0.0498  |        |
| Pre-post race (1 <sup>st</sup> race)                         |        | <0.0001 |        |
| Pre-post race (2 <sup>nd</sup> race)                         |        | 0.0048  |        |
|                                                              |        |         |        |
| <i>Panax ginseng</i>                                         |        |         |        |
| Time (Pre – post race)                                       | 0.0464 | 0.8302  | 0.0008 |
| 10 km race (1 <sup>st</sup> vs 2 <sup>nd</sup> race)         | 27.49  | <0.0001 | 0.3292 |
| Multiple comparison                                          |        |         |        |
| Pre-race (1 <sup>st</sup> race vs 2 <sup>nd</sup> race)      |        | 0.1606  |        |
| Post-race (1 <sup>st</sup> race vs 2 <sup>nd</sup> race)     |        | 0.0897  |        |
| Pre-post race (1 <sup>st</sup> race)                         |        | <0.0001 |        |
| Pre-post race (2 <sup>nd</sup> race)                         |        | 0.0373  |        |
|                                                              |        |         |        |
| <b>K. IL-8</b>                                               |        |         |        |
| <i>Before 10 km race</i>                                     |        |         |        |
| Time (1 <sup>st</sup> race vs 2 <sup>nd</sup> race)          | 0.1777 | 0.6772  | 0.0077 |
| Treatment (Placebo vs PG)                                    | 1.021  | 0.3227  | 0.0979 |
| Multiple comparison                                          |        |         |        |
| Placebo (1 <sup>st</sup> race vs 2 <sup>nd</sup> race)       |        | 0.5618  |        |
| Panax ginseng (1 <sup>st</sup> race vs 2 <sup>nd</sup> race) |        | 0.9672  |        |
| First race (Placebo vs PG)                                   |        | 0.5139  |        |
| Second race (Placebo vs PG)                                  |        | 0.3015  |        |
|                                                              |        |         |        |
| <i>After 10 km race</i>                                      |        |         |        |



|                                                              |        |         |        |
|--------------------------------------------------------------|--------|---------|--------|
| Time (1 <sup>st</sup> race vs 2 <sup>nd</sup> race)          | 0.2971 | 0.5909  | 0.0128 |
| Treatment (Placebo vs PG)                                    | 0.7773 | 0.3871  | 0.1461 |
| Multiple comparison                                          |        |         |        |
| Placebo (1 <sup>st</sup> race vs 2 <sup>nd</sup> race)       |        | 0.9934  |        |
| Panax ginseng (1 <sup>st</sup> race vs 2 <sup>nd</sup> race) |        | 0.4693  |        |
| First race (Placebo vs PG)                                   |        | 0.3077  |        |
| Second race (Placebo vs PG)                                  |        | 0.5649  |        |
|                                                              |        |         |        |
| <i>Placebo</i>                                               |        |         |        |
| Time (Pre – post race)                                       | 4.478  | 0.0434  | 0.1379 |
| 10 km race (1 <sup>st</sup> vs 2 <sup>nd</sup> race)         | 0.5456 | 0.4663  | 0.0571 |
| Multiple comparison                                          |        |         |        |
| Pre-race (1 <sup>st</sup> race vs 2 <sup>nd</sup> race)      |        | 0.3217  |        |
| Post-race (1 <sup>st</sup> race vs 2 <sup>nd</sup> race)     |        | 0.7765  |        |
| Pre-post race (1 <sup>st</sup> race)                         |        | 0.0543  |        |
| Pre-post race (2 <sup>nd</sup> race)                         |        | 0.3334  |        |
|                                                              |        |         |        |
| <i>Panax ginseng</i>                                         |        |         |        |
| Time (Pre – post race)                                       | 7.444  | 0.0120  | 0.2445 |
| 10 km race (1 <sup>st</sup> vs 2 <sup>nd</sup> race)         | 0.3596 | 0.5546  | 0.0532 |
| Multiple comparison                                          |        |         |        |
| Pre-race (1 <sup>st</sup> race vs 2 <sup>nd</sup> race)      |        | 0.8091  |        |
| Post-race (1 <sup>st</sup> race vs 2 <sup>nd</sup> race)     |        | 0.4177  |        |
| Pre-post race (1 <sup>st</sup> race)                         |        | 0.1566  |        |
| Pre-post race (2 <sup>nd</sup> race)                         |        | 0.0242  |        |
|                                                              |        |         |        |
| <b>L. IL-10</b>                                              |        |         |        |
| <i>Before 10 km race</i>                                     |        |         |        |
| Time (1 <sup>st</sup> race vs 2 <sup>nd</sup> race)          | 0.5091 | 0.4812  | 0.0173 |
| Treatment (Placebo vs PG)                                    | 0.4846 | 0.4919  | 0.0585 |
| Multiple comparison                                          |        |         |        |
| Placebo (1 <sup>st</sup> race vs 2 <sup>nd</sup> race)       |        | 0.4002  |        |
| Panax ginseng (1 <sup>st</sup> race vs 2 <sup>nd</sup> race) |        | 0.8690  |        |
| First race (Placebo vs PG)                                   |        | 0.4064  |        |
| Second race (Placebo vs PG)                                  |        | 0.6909  |        |
|                                                              |        |         |        |
| <i>After 10 km race</i>                                      |        |         |        |
| Time (1 <sup>st</sup> race vs 2 <sup>nd</sup> race)          | 3.992  | 0.0552  | 0.1210 |
| Treatment (Placebo vs PG)                                    | 1.100  | 0.3029  | 0.2108 |
| Multiple comparison                                          |        |         |        |
| Placebo (1 <sup>st</sup> race vs 2 <sup>nd</sup> race)       |        | 0.7949  |        |
| Panax ginseng (1 <sup>st</sup> race vs 2 <sup>nd</sup> race) |        | 0.0172  |        |
| First race (Placebo vs PG)                                   |        | 0.1248  |        |
| Second race (Placebo vs PG)                                  |        | 0.6864  |        |
|                                                              |        |         |        |
| <i>Placebo</i>                                               |        |         |        |
| Time (Pre – post race)                                       | 27.77  | <0.0001 | 0.4807 |
| 10 km race (1 <sup>st</sup> vs 2 <sup>nd</sup> race)         | 0.0013 | 0.9712  | 0.0001 |
| Multiple comparison                                          |        |         |        |
| Pre-race (1 <sup>st</sup> race vs 2 <sup>nd</sup> race)      |        | 0.8381  |        |
| Post-race (1 <sup>st</sup> race vs 2 <sup>nd</sup> race)     |        | 0.8838  |        |
| Pre-post race (1 <sup>st</sup> race)                         |        | 0.0014  |        |
| Pre-post race (2 <sup>nd</sup> race)                         |        | 0.0005  |        |
|                                                              |        |         |        |
| <i>Panax ginseng</i>                                         |        |         |        |

|                                                              |        |         |        |
|--------------------------------------------------------------|--------|---------|--------|
| Time (Pre – post race)                                       | 30.10  | <0.0001 | 0.5181 |
| 10 km race (1 <sup>st</sup> vs 2 <sup>nd</sup> race)         | 2.197  | 0.1495  | 0.0966 |
| Multiple comparison                                          |        |         |        |
| Pre-race (1 <sup>st</sup> race vs 2 <sup>nd</sup> race)      |        | 0.9480  |        |
| Post-race (1 <sup>st</sup> race vs 2 <sup>nd</sup> race)     |        | 0.0242  |        |
| Pre-post race (1 <sup>st</sup> race)                         |        | 0.0152  |        |
| Pre-post race (2 <sup>nd</sup> race)                         |        | <0.0001 |        |
|                                                              |        |         |        |
| <b>M. TNF<math>\alpha</math></b>                             |        |         |        |
| <i>Before 10 km race</i>                                     |        |         |        |
| Time (1 <sup>st</sup> race vs 2 <sup>nd</sup> race)          | 0.5420 | 0.4687  | 0.0221 |
| Treatment (Placebo vs PG)                                    | 1.537  | 0.2271  | 0.1835 |
| Multiple comparison                                          |        |         |        |
| Placebo (1 <sup>st</sup> race vs 2 <sup>nd</sup> race)       |        | 0.6102  |        |
| Panax ginseng (1 <sup>st</sup> race vs 2 <sup>nd</sup> race) |        | 0.6031  |        |
| First race (Placebo vs PG)                                   |        | 0.2666  |        |
| Second race (Placebo vs PG)                                  |        | 0.2929  |        |
|                                                              |        |         |        |
| <i>After 10 km race</i>                                      |        |         |        |
| Time (1 <sup>st</sup> race vs 2 <sup>nd</sup> race)          | 1.641  | 0.2125  | 0.0640 |
| Treatment (Placebo vs PG)                                    | 1.536  | 0.2272  | 0.3062 |
| Multiple comparison                                          |        |         |        |
| Placebo (1 <sup>st</sup> race vs 2 <sup>nd</sup> race)       |        | 0.3314  |        |
| Panax ginseng (1 <sup>st</sup> race vs 2 <sup>nd</sup> race) |        | 0.4106  |        |
| First race (Placebo vs PG)                                   |        | 0.2538  |        |
| Second race (Placebo vs PG)                                  |        | 0.2513  |        |
|                                                              |        |         |        |
| <i>Placebo</i>                                               |        |         |        |
| Time (Pre – post race)                                       | 2.929  | 0.0977  | 0.0917 |
| 10 km race (1 <sup>st</sup> vs 2 <sup>nd</sup> race)         | 0.1840 | 0.6711  | 0.0216 |
| Multiple comparison                                          |        |         |        |
| Pre-race (1 <sup>st</sup> race vs 2 <sup>nd</sup> race)      |        | 0.6296  |        |
| Post-race (1 <sup>st</sup> race vs 2 <sup>nd</sup> race)     |        | 0.7873  |        |
| Pre-post race (1 <sup>st</sup> race)                         |        | 0.1879  |        |
| Pre-post race (2 <sup>nd</sup> race)                         |        | 0.2945  |        |
|                                                              |        |         |        |
| <i>Panax ginseng</i>                                         |        |         |        |
| Time (Pre – post race)                                       | 8.914  | 0.0068  | 0.2833 |
| 10 km race (1 <sup>st</sup> vs 2 <sup>nd</sup> race)         | 0.1013 | 0.7533  | 0.0163 |
| Multiple comparison                                          |        |         |        |
| Pre-race (1 <sup>st</sup> race vs 2 <sup>nd</sup> race)      |        | 0.8942  |        |
| Post-race (1 <sup>st</sup> race vs 2 <sup>nd</sup> race)     |        | 0.6698  |        |
| Pre-post race (1 <sup>st</sup> race)                         |        | 0.0724  |        |
| Pre-post race (2 <sup>nd</sup> race)                         |        | 0.0290  |        |

Table S3. Two-way ANOVA statistical analysis results for aerobic capacity, blood and perceived effort parameters of volunteer's sub-maximal aerobic test.

| Parameter                                                    | F      | p-value | Partial eta squared |
|--------------------------------------------------------------|--------|---------|---------------------|
| <b>A. VO<sub>2</sub></b>                                     |        |         |                     |
| Time (1 <sup>st</sup> test vs 2 <sup>nd</sup> test)          | 0.1121 | 0.7416  | 0.0062              |
| Treatment (Placebo vs PG)                                    | 0.0898 | 0.2922  | 0.6638              |
| Multiple comparison                                          |        |         |                     |
| Placebo (1 <sup>st</sup> test vs 2 <sup>nd</sup> test)       |        | 0.0717  |                     |
| Panax ginseng (1 <sup>st</sup> test vs 2 <sup>nd</sup> test) |        | 0.0863  |                     |
| First test (Placebo vs PG)                                   |        | 0.1326  |                     |
| Second test (Placebo vs PG)                                  |        | 0.5544  |                     |
| <b>B. VCO<sub>2</sub></b>                                    |        |         |                     |
| Time (1 <sup>st</sup> test vs 2 <sup>nd</sup> test)          | 0.2284 | 0.6385  | 0.0125              |
| Treatment (Placebo vs PG)                                    | 1.552  | 0.2288  | 0.5953              |
| Multiple comparison                                          |        |         |                     |
| Placebo (1 <sup>st</sup> test vs 2 <sup>nd</sup> test)       |        | 0.2188  |                     |
| Panax ginseng (1 <sup>st</sup> test vs 2 <sup>nd</sup> test) |        | 0.4315  |                     |
| First test (Placebo vs PG)                                   |        | 0.1269  |                     |
| Second test (Placebo vs PG)                                  |        | 0.3962  |                     |
| <b>C. RER</b>                                                |        |         |                     |
| Time (1 <sup>st</sup> test vs 2 <sup>nd</sup> test)          | 0.4600 | 0.5063  | 0.0249              |
| Treatment (Placebo vs PG)                                    | 0.0803 | 0.7801  | 0.0066              |
| Multiple comparison                                          |        |         |                     |
| Placebo (1 <sup>st</sup> test vs 2 <sup>nd</sup> test)       |        | 0.5193  |                     |
| Panax ginseng (1 <sup>st</sup> test vs 2 <sup>nd</sup> test) |        | 0.7923  |                     |
| First test (Placebo vs PG)                                   |        | 0.9973  |                     |
| Second test (Placebo vs PG)                                  |        | 0.6663  |                     |
| <b>D. VE</b>                                                 |        |         |                     |
| Time (1 <sup>st</sup> test vs 2 <sup>nd</sup> test)          | 0.4057 | 0.5322  | 0.0220              |
| Treatment (Placebo vs PG)                                    | 0.0898 | 0.7678  | 0.0700              |
| Multiple comparison                                          |        |         |                     |
| Placebo (1 <sup>st</sup> test vs 2 <sup>nd</sup> test)       |        | 0.8897  |                     |
| Panax ginseng (1 <sup>st</sup> test vs 2 <sup>nd</sup> test) |        | 0.2536  |                     |
| First test (Placebo vs PG)                                   |        | 0.9390  |                     |
| Second test (Placebo vs PG)                                  |        | 0.6177  |                     |
| <b>E. VE/VO<sub>2</sub></b>                                  |        |         |                     |
| Time (1 <sup>st</sup> test vs 2 <sup>nd</sup> test)          | 0.0461 | 0.8324  | 0.0026              |
| Treatment (Placebo vs PG)                                    | 0.1078 | 0.7465  | 0.0914              |
| Multiple comparison                                          |        |         |                     |
| Placebo (1 <sup>st</sup> test vs 2 <sup>nd</sup> test)       |        | 0.5957  |                     |
| Panax ginseng (1 <sup>st</sup> test vs 2 <sup>nd</sup> test) |        | 0.3301  |                     |
| First test (Placebo vs PG)                                   |        | 0.9448  |                     |
| Second test (Placebo vs PG)                                  |        | 0.5735  |                     |
| <b>F. Heart rate</b>                                         |        |         |                     |
| Time (1 <sup>st</sup> test vs 2 <sup>nd</sup> test)          | 0.5803 | 0.4561  | 0.0312              |
| Treatment (Placebo vs PG)                                    | 0.0237 | 0.8792  | 0.0141              |
| Multiple comparison                                          |        |         |                     |
| Placebo (1 <sup>st</sup> test vs 2 <sup>nd</sup> test)       |        | 0.9735  |                     |

|                                                                |        |         |        |
|----------------------------------------------------------------|--------|---------|--------|
| Panax ginseng (1 <sup>st</sup> test vs 2 <sup>nd</sup> test)   |        | 0.2285  |        |
| First test (Placebo vs PG)                                     |        | 0.7029  |        |
| Second test (Placebo vs PG)                                    |        | 0.9292  |        |
|                                                                |        |         |        |
| <b>G. Borg's perceived exertion (CR-10)</b>                    |        |         |        |
| Time (1 <sup>st</sup> test vs 2 <sup>nd</sup> test)            | 0.2483 | 0.6243  | 0.0136 |
| Treatment (Placebo vs PG)                                      | 0.4303 | 0.5201  | 0.2565 |
| Multiple comparison                                            |        |         |        |
| Placebo (1 <sup>st</sup> test vs 2 <sup>nd</sup> test)         |        | >0.9999 |        |
| Panax ginseng (1 <sup>st</sup> test vs 2 <sup>nd</sup> test)   |        | 0.4410  |        |
| First test (Placebo vs PG)                                     |        | 0.4515  |        |
| Second test (Placebo vs PG)                                    |        | 0.6149  |        |
|                                                                |        |         |        |
| <b>H. Lactate</b>                                              |        |         |        |
| <i>Before Sub-maximal aerobic test</i>                         |        |         |        |
| Time (1 <sup>st</sup> test vs 2 <sup>nd</sup> test)            | 3.237  | 0.0888  | 0.1524 |
| Treatment (Placebo vs PG)                                      | 0.0537 | 0.8194  | 0.0099 |
| Multiple comparison                                            |        |         |        |
| Placebo (1 <sup>st</sup> test vs 2 <sup>nd</sup> test)         |        | 0.2090  |        |
| Panax ginseng (1 <sup>st</sup> test vs 2 <sup>nd</sup> test)   |        | 0.2277  |        |
| First test (Placebo vs PG)                                     |        | 0.9223  |        |
| Second test (Placebo vs PG)                                    |        | 0.7595  |        |
|                                                                |        |         |        |
| <i>After Sub-maximal aerobic test</i>                          |        |         |        |
| Time (1 <sup>st</sup> test vs 2 <sup>nd</sup> test)            | 0.6512 | 0.4302  | 0.0349 |
| Treatment (Placebo vs PG)                                      | 0.0337 | 0.8565  | 0.0049 |
| Multiple comparison                                            |        |         |        |
| Placebo (1 <sup>st</sup> test vs 2 <sup>nd</sup> test)         |        | 0.2913  |        |
| Panax ginseng (1 <sup>st</sup> test vs 2 <sup>nd</sup> test)   |        | 0.9564  |        |
| First test (Placebo vs PG)                                     |        | 0.7634  |        |
| Second test (Placebo vs PG)                                    |        | 0.5419  |        |
|                                                                |        |         |        |
| <i>Placebo</i>                                                 |        |         |        |
| Time (Pre – post test)                                         | 36.02  | <0.0001 | 0.7201 |
| Sub-maximal aerobic test (1 <sup>st</sup> vs 2 <sup>nd</sup> ) | 1.460  | 0.2470  | 0.1353 |
| Multiple comparison                                            |        |         |        |
| Pre-test (1 <sup>st</sup> vs 2 <sup>nd</sup> )                 |        | 0.4403  |        |
| Post-test (1 <sup>st</sup> vs 2 <sup>nd</sup> test)            |        | 0.2854  |        |
| Pre-post test (1 <sup>st</sup> test)                           |        | 0.0006  |        |
| Pre-post test (2 <sup>nd</sup> test)                           |        | 0.0011  |        |
|                                                                |        |         |        |
| <i>Panax ginseng</i>                                           |        |         |        |
| Time (Pre – post test)                                         | 53.33  | <0.0001 | 0.7080 |
| Sub-maximal aerobic test (1 <sup>st</sup> vs 2 <sup>nd</sup> ) | 0.1106 | 0.7426  | 0.0132 |
| Multiple comparison                                            |        |         |        |
| Pre-test (1 <sup>st</sup> vs 2 <sup>nd</sup> )                 |        | 0.5436  |        |
| Post-test (1 <sup>st</sup> vs 2 <sup>nd</sup> test)            |        | 0.9640  |        |
| Pre-post test (1 <sup>st</sup> test)                           |        | 0.0001  |        |
| Pre-post test (2 <sup>nd</sup> test)                           |        | <0.0001 |        |
|                                                                |        |         |        |
| <b>I. Total lipids</b>                                         |        |         |        |
| <i>Before Sub-maximal aerobic test</i>                         |        |         |        |
| Time (1 <sup>st</sup> test vs 2 <sup>nd</sup> test)            | 0.2086 | 0.6533  | 0.0115 |
| Treatment (Placebo vs PG)                                      | 0.0016 | 0.9680  | 0.0005 |
| Multiple comparison                                            |        |         |        |

|                                                                |        |         |        |
|----------------------------------------------------------------|--------|---------|--------|
| Placebo (1 <sup>st</sup> test vs 2 <sup>nd</sup> test)         |        | 0.0418  |        |
| Panax ginseng (1 <sup>st</sup> test vs 2 <sup>nd</sup> test)   |        | 0.0031  |        |
| First test (Placebo vs PG)                                     |        | 0.1378  |        |
| Second test (Placebo vs PG)                                    |        | 0.1568  |        |
|                                                                |        |         |        |
| <i>After Sub-maximal aerobic test</i>                          |        |         |        |
| Time (1 <sup>st</sup> test vs 2 <sup>nd</sup> test)            | 0.0764 | 0.7853  | 0.0042 |
| Treatment (Placebo vs PG)                                      | 0.0022 | 0.9630  | 0.0003 |
| Multiple comparison                                            |        |         |        |
| Placebo (1 <sup>st</sup> test vs 2 <sup>nd</sup> test)         |        | 0.5540  |        |
| Panax ginseng (1 <sup>st</sup> test vs 2 <sup>nd</sup> test)   |        | 0.7660  |        |
| First test (Placebo vs PG)                                     |        | 0.7656  |        |
| Second test (Placebo vs PG)                                    |        | 0.7055  |        |
|                                                                |        |         |        |
| <i>Placebo</i>                                                 |        |         |        |
| Time (Pre – post test)                                         | 3.742  | 0.0735  | 0.2109 |
| Sub-maximal aerobic test (1 <sup>st</sup> vs 2 <sup>nd</sup> ) | 1.478  | 0.2442  | 0.1816 |
| Multiple comparison                                            |        |         |        |
| Pre-test (1 <sup>st</sup> vs 2 <sup>nd</sup> )                 |        | 0.1596  |        |
| Post-test (1 <sup>st</sup> vs 2 <sup>nd</sup> test)            |        | 0.5821  |        |
| Pre-post test (1 <sup>st</sup> test)                           |        | 0.0753  |        |
| Pre-post test (2 <sup>nd</sup> test)                           |        | 0.4287  |        |
|                                                                |        |         |        |
| <i>Panax ginseng</i>                                           |        |         |        |
| Time (Pre – post test)                                         | 3.032  | 0.0956  | 0.1211 |
| Sub-maximal aerobic test (1 <sup>st</sup> vs 2 <sup>nd</sup> ) | 1.174  | 0.2904  | 0.1253 |
| Multiple comparison                                            |        |         |        |
| Pre-test (1 <sup>st</sup> vs 2 <sup>nd</sup> )                 |        | 0.1070  |        |
| Post-test (1 <sup>st</sup> vs 2 <sup>nd</sup> test)            |        | 0.8394  |        |
| Pre-post test (1 <sup>st</sup> test)                           |        | 0.8028  |        |
| Pre-post test (2 <sup>nd</sup> test)                           |        | 0.0378  |        |
|                                                                |        |         |        |
| <b>J. Phospholipids</b>                                        |        |         |        |
| <i>Before Sub-maximal aerobic test</i>                         |        |         |        |
| Time (1 <sup>st</sup> test vs 2 <sup>nd</sup> test)            | 0.0216 | 0.8841  | 0.0006 |
| Treatment (Placebo vs PG)                                      | 7.787  | 0.0084  | 0.1779 |
| Multiple comparison                                            |        |         |        |
| Placebo (1 <sup>st</sup> test vs 2 <sup>nd</sup> test)         |        | >0.9999 |        |
| Panax ginseng (1 <sup>st</sup> test vs 2 <sup>nd</sup> test)   |        | 0.8177  |        |
| First test (Placebo vs PG)                                     |        | 0.0697  |        |
| Second test (Placebo vs PG)                                    |        | 0.0450  |        |
|                                                                |        |         |        |
| <i>After Sub-maximal aerobic test</i>                          |        |         |        |
| Time (1 <sup>st</sup> test vs 2 <sup>nd</sup> test)            | 0.1557 | 0.6955  | 0.0043 |
| Treatment (Placebo vs PG)                                      | 1.147  | 0.2913  | 0.0309 |
| Multiple comparison                                            |        |         |        |
| Placebo (1 <sup>st</sup> test vs 2 <sup>nd</sup> test)         |        | 0.7181  |        |
| Panax ginseng (1 <sup>st</sup> test vs 2 <sup>nd</sup> test)   |        | 0.8595  |        |
| First test (Placebo vs PG)                                     |        | 0.5277  |        |
| Second test (Placebo vs PG)                                    |        | 0.3864  |        |
|                                                                |        |         |        |
| <i>Placebo</i>                                                 |        |         |        |
| Time (Pre – post test)                                         | 7.660  | 0.0099  | 0.2148 |
| Sub-maximal aerobic test (1 <sup>st</sup> vs 2 <sup>nd</sup> ) | 0.0589 | 0.8099  | 0.0021 |
| Multiple comparison                                            |        |         |        |

|                                                                |        |         |        |
|----------------------------------------------------------------|--------|---------|--------|
| Pre-test (1 <sup>st</sup> vs 2 <sup>nd</sup> )                 |        | >0.9999 |        |
| Post-test (1 <sup>st</sup> vs 2 <sup>nd</sup> test)            |        | 0.7339  |        |
| Pre-post test (1 <sup>st</sup> test)                           |        | 0.0850  |        |
| Pre-post test (2 <sup>nd</sup> test)                           |        | 0.0422  |        |
| <i>Panax ginseng</i>                                           |        |         |        |
| Time (Pre – post test)                                         | 57.59  | <0.0001 | 0.5669 |
| Sub-maximal aerobic test (1 <sup>st</sup> vs 2 <sup>nd</sup> ) | 0.0177 | 0.8947  | 0.0004 |
| Multiple comparison                                            |        |         |        |
| Pre-test (1 <sup>st</sup> vs 2 <sup>nd</sup> )                 |        | 0.8515  |        |
| Post-test (1 <sup>st</sup> vs 2 <sup>nd</sup> test)            |        | 0.7083  |        |
| Pre-post test (1 <sup>st</sup> test)                           |        | <0.0001 |        |
| Pre-post test (2 <sup>nd</sup> test)                           |        | <0.0001 |        |
| <b>K. Total cholesterol</b>                                    |        |         |        |
| <i>Before Sub-maximal aerobic test</i>                         |        |         |        |
| Time (1 <sup>st</sup> test vs 2 <sup>nd</sup> test)            | 0.1730 | 0.6824  | 0.0095 |
| Treatment (Placebo vs PG)                                      | 1.137  | 0.3005  | 0.3183 |
| Multiple comparison                                            |        |         |        |
| Placebo (1 <sup>st</sup> test vs 2 <sup>nd</sup> test)         |        | 0.5928  |        |
| Panax ginseng (1 <sup>st</sup> test vs 2 <sup>nd</sup> test)   |        | 0.9928  |        |
| First test (Placebo vs PG)                                     |        | 0.3993  |        |
| Second test (Placebo vs PG)                                    |        | 0.2585  |        |
| <i>After Sub-maximal aerobic test</i>                          |        |         |        |
| Time (1 <sup>st</sup> test vs 2 <sup>nd</sup> test)            | 3.315  | 0.0853  | 0.1555 |
| Treatment (Placebo vs PG)                                      | 1.374  | 0.2563  | 0.1687 |
| Multiple comparison                                            |        |         |        |
| Placebo (1 <sup>st</sup> test vs 2 <sup>nd</sup> test)         |        | 0.0720  |        |
| Panax ginseng (1 <sup>st</sup> test vs 2 <sup>nd</sup> test)   |        | 0.5974  |        |
| First test (Placebo vs PG)                                     |        | 0.6893  |        |
| Second test (Placebo vs PG)                                    |        | 0.1193  |        |
| <i>Placebo</i>                                                 |        |         |        |
| Time (Pre – post test)                                         | 1.406  | 0.2555  | 0.0913 |
| Sub-maximal aerobic test (1 <sup>st</sup> vs 2 <sup>nd</sup> ) | 0.5902 | 0.4551  | 0.1812 |
| Multiple comparison                                            |        |         |        |
| Pre-test (1 <sup>st</sup> vs 2 <sup>nd</sup> )                 |        | 0.8367  |        |
| Post-test (1 <sup>st</sup> vs 2 <sup>nd</sup> test)            |        | 0.2401  |        |
| Pre-post test (1 <sup>st</sup> test)                           |        | 0.9699  |        |
| Pre-post test (2 <sup>nd</sup> test)                           |        | 0.1083  |        |
| <i>Panax ginseng</i>                                           |        |         |        |
| Time (Pre – post test)                                         | 2.863  | 0.1157  | 0.1087 |
| Sub-maximal aerobic test (1 <sup>st</sup> vs 2 <sup>nd</sup> ) | 0.0778 | 0.7829  | 0.0130 |
| Multiple comparison                                            |        |         |        |
| Pre-test (1 <sup>st</sup> vs 2 <sup>nd</sup> )                 |        | 0.9959  |        |
| Post-test (1 <sup>st</sup> vs 2 <sup>nd</sup> test)            |        | 0.6192  |        |
| Pre-post test (1 <sup>st</sup> test)                           |        | 0.4500  |        |
| Pre-post test (2 <sup>nd</sup> test)                           |        | 0.1361  |        |
| <b>L. Triacylglycerides</b>                                    |        |         |        |
| <i>Before Sub-maximal aerobic test</i>                         |        |         |        |
| Time (1 <sup>st</sup> test vs 2 <sup>nd</sup> test)            | 0.5781 | 0.4581  | 0.0349 |
| Treatment (Placebo vs PG)                                      | 1.777  | 0.2012  | 0.0793 |

|                                                                |        |        |        |
|----------------------------------------------------------------|--------|--------|--------|
| Multiple comparison                                            |        |        |        |
| Placebo (1 <sup>st</sup> test vs 2 <sup>nd</sup> test)         |        | 0.9154 |        |
| Panax ginseng (1 <sup>st</sup> test vs 2 <sup>nd</sup> test)   |        | 0.2254 |        |
| First test (Placebo vs PG)                                     |        | 0.1257 |        |
| Second test (Placebo vs PG)                                    |        | 0.8507 |        |
|                                                                |        |        |        |
| <i>After Sub-maximal aerobic test</i>                          |        |        |        |
| Time (1 <sup>st</sup> test vs 2 <sup>nd</sup> test)            | 0.6416 | 0.4349 | 0.0386 |
| Treatment (Placebo vs PG)                                      | 2.714  | 0.1190 | 0.1349 |
| Multiple comparison                                            |        |        |        |
| Placebo (1 <sup>st</sup> test vs 2 <sup>nd</sup> test)         |        | 0.8960 |        |
| Panax ginseng (1 <sup>st</sup> test vs 2 <sup>nd</sup> test)   |        | 0.3080 |        |
| First test (Placebo vs PG)                                     |        | 0.1250 |        |
| Second test (Placebo vs PG)                                    |        | 0.4860 |        |
|                                                                |        |        |        |
| <i>Placebo</i>                                                 |        |        |        |
| Time (Pre – post test)                                         | 4.512  | 0.0520 | 0.2437 |
| Sub-maximal aerobic test (1 <sup>st</sup> vs 2 <sup>nd</sup> ) | 0.0006 | 0.9805 | 0.0003 |
| Multiple comparison                                            |        |        |        |
| Pre-test (1 <sup>st</sup> vs 2 <sup>nd</sup> )                 |        | 0.8327 |        |
| Post-test (1 <sup>st</sup> vs 2 <sup>nd</sup> test)            |        | 0.7971 |        |
| Pre-post test (1 <sup>st</sup> test)                           |        | 0.0701 |        |
| Pre-post test (2 <sup>nd</sup> test)                           |        | 0.3146 |        |
|                                                                |        |        |        |
| <i>Panax ginseng</i>                                           |        |        |        |
| Time (Pre – post test)                                         | 13.56  | 0.0015 | 0.4041 |
| Sub-maximal aerobic test (1 <sup>st</sup> vs 2 <sup>nd</sup> ) | 0.4426 | 0.5135 | 0.3372 |
| Multiple comparison                                            |        |        |        |
| Pre-test (1 <sup>st</sup> vs 2 <sup>nd</sup> )                 |        | 0.3835 |        |
| Post-test (1 <sup>st</sup> vs 2 <sup>nd</sup> test)            |        | 0.6758 |        |
| Pre-post test (1 <sup>st</sup> test)                           |        | 0.0990 |        |
| Pre-post test (2 <sup>nd</sup> test)                           |        | 0.0019 |        |
|                                                                |        |        |        |
| <b>M. Non-esterified fatty acids</b>                           |        |        |        |
| <i>Before Sub-maximal aerobic test</i>                         |        |        |        |
| Time (1 <sup>st</sup> test vs 2 <sup>nd</sup> test)            | 3.424  | 0.0725 | 0.0869 |
| Treatment (Placebo vs PG)                                      | 14.40  | 0.0005 | 0.2858 |
| Multiple comparison                                            |        |        |        |
| Placebo (1 <sup>st</sup> test vs 2 <sup>nd</sup> test)         |        | 0.0364 |        |
| Panax ginseng (1 <sup>st</sup> test vs 2 <sup>nd</sup> test)   |        | 0.9938 |        |
| First test (Placebo vs PG)                                     |        | 0.3704 |        |
| Second test (Placebo vs PG)                                    |        | 0.0005 |        |
|                                                                |        |        |        |
| <i>After Sub-maximal aerobic test</i>                          |        |        |        |
| Time (1 <sup>st</sup> test vs 2 <sup>nd</sup> test)            | 0.0297 | 0.8640 | 0.0008 |
| Treatment (Placebo vs PG)                                      | 12.50  | 0.0011 | 0.2577 |
| Multiple comparison                                            |        |        |        |
| Placebo (1 <sup>st</sup> test vs 2 <sup>nd</sup> test)         |        | 0.7404 |        |
| Panax ginseng (1 <sup>st</sup> test vs 2 <sup>nd</sup> test)   |        | 0.4998 |        |
| First test (Placebo vs PG)                                     |        | 0.0517 |        |
| Second test (Placebo vs PG)                                    |        | 0.0050 |        |
|                                                                |        |        |        |
| <i>Placebo</i>                                                 |        |        |        |
| Time (Pre – post test)                                         | 1.527  | 0.2269 | 0.0517 |
| Sub-maximal aerobic test (1 <sup>st</sup> vs 2 <sup>nd</sup> ) | 1.644  | 0.2103 | 0.0555 |

|                                                                |        |         |        |
|----------------------------------------------------------------|--------|---------|--------|
| Multiple comparison                                            |        |         |        |
| Pre-test (1 <sup>st</sup> vs 2 <sup>nd</sup> )                 |        | 0.0540  |        |
| Post-test (1 <sup>st</sup> vs 2 <sup>nd</sup> test)            |        | 0.8446  |        |
| Pre-post test (1 <sup>st</sup> test)                           |        | 0.8192  |        |
| Pre-post test (2 <sup>nd</sup> test)                           |        | 0.0578  |        |
| <i>Panax ginseng</i>                                           |        |         |        |
| Time (Pre – post test)                                         | 94.94  | <0.0001 | 0.6833 |
| Sub-maximal aerobic test (1 <sup>st</sup> vs 2 <sup>nd</sup> ) | 0.2700 | 0.6059  | 0.0061 |
| Multiple comparison                                            |        |         |        |
| Pre-test (1 <sup>st</sup> vs 2 <sup>nd</sup> )                 |        | 0.8551  |        |
| Post-test (1 <sup>st</sup> vs 2 <sup>nd</sup> test)            |        | 0.3633  |        |
| Pre-post test (1 <sup>st</sup> test)                           |        | <0.0001 |        |
| Pre-post test (2 <sup>nd</sup> test)                           |        | <0.0001 |        |
| <b>N. IL-1ra</b>                                               |        |         |        |
| <i>Before Sub-maximal aerobic test</i>                         |        |         |        |
| Time (1 <sup>st</sup> test vs 2 <sup>nd</sup> test)            | 1.803  | 0.2042  | 0.1307 |
| Treatment (Placebo vs PG)                                      | 4.271  | 0.0611  | 0.7274 |
| Multiple comparison                                            |        |         |        |
| Placebo (1 <sup>st</sup> test vs 2 <sup>nd</sup> test)         |        | 0.1228  |        |
| Panax ginseng (1 <sup>st</sup> test vs 2 <sup>nd</sup> test)   |        | 0.8954  |        |
| First test (Placebo vs PG)                                     |        | 0.1364  |        |
| Second test (Placebo vs PG)                                    |        | 0.0278  |        |
| <i>After Sub-maximal aerobic test</i>                          |        |         |        |
| Time (1 <sup>st</sup> test vs 2 <sup>nd</sup> test)            | 0.1802 | 0.6787  | 0.0148 |
| Treatment (Placebo vs PG)                                      | 4.665  | 0.0517  | 0.2952 |
| Multiple comparison                                            |        |         |        |
| Placebo (1 <sup>st</sup> test vs 2 <sup>nd</sup> test)         |        | 0.5179  |        |
| Panax ginseng (1 <sup>st</sup> test vs 2 <sup>nd</sup> test)   |        | 0.9059  |        |
| First test (Placebo vs PG)                                     |        | 0.2610  |        |
| Second test (Placebo vs PG)                                    |        | 0.0618  |        |
| <i>Placebo</i>                                                 |        |         |        |
| Time (Pre – post test)                                         | 2.816  | 0.1243  | 0.2197 |
| Sub-maximal aerobic test (1 <sup>st</sup> vs 2 <sup>nd</sup> ) | 0.4197 | 0.5317  | 0.0887 |
| Multiple comparison                                            |        |         |        |
| Pre-test (1 <sup>st</sup> vs 2 <sup>nd</sup> )                 |        | 0.6318  |        |
| Post-test (1 <sup>st</sup> vs 2 <sup>nd</sup> test)            |        | 0.5577  |        |
| Pre-post test (1 <sup>st</sup> test)                           |        | 0.2905  |        |
| Pre-post test (2 <sup>nd</sup> test)                           |        | 0.2373  |        |
| <i>Panax ginseng</i>                                           |        |         |        |
| Time (Pre – post test)                                         | 9.211  | 0.0075  | 0.3514 |
| Sub-maximal aerobic test (1 <sup>st</sup> vs 2 <sup>nd</sup> ) | 0.3012 | 0.5903  | 0.0677 |
| Multiple comparison                                            |        |         |        |
| Pre-test (1 <sup>st</sup> vs 2 <sup>nd</sup> )                 |        | 0.6957  |        |
| Post-test (1 <sup>st</sup> vs 2 <sup>nd</sup> test)            |        | 0.5594  |        |
| Pre-post test (1 <sup>st</sup> test)                           |        | 0.0302  |        |
| Pre-post test (2 <sup>nd</sup> test)                           |        | 0.0692  |        |
| <b>O. IL-6</b>                                                 |        |         |        |
| <i>Before Sub-maximal aerobic test</i>                         |        |         |        |
| Time (1 <sup>st</sup> test vs 2 <sup>nd</sup> test)            | 1.004  | 0.3399  | 0.0913 |



|                                                                |        |        |        |
|----------------------------------------------------------------|--------|--------|--------|
| Treatment (Placebo vs PG)                                      | 0.3070 | 0.5917 | 0.1805 |
| Multiple comparison                                            |        |        |        |
| Placebo (1 <sup>st</sup> test vs 2 <sup>nd</sup> test)         |        | 0.8386 |        |
| Panax ginseng (1 <sup>st</sup> test vs 2 <sup>nd</sup> test)   |        | 0.2548 |        |
| First test (Placebo vs PG)                                     |        | 0.7884 |        |
| Second test (Placebo vs PG)                                    |        | 0.4525 |        |
|                                                                |        |        |        |
| <i>After Sub-maximal aerobic test</i>                          |        |        |        |
| Time (1 <sup>st</sup> test vs 2 <sup>nd</sup> test)            | 1.269  | 0.2863 | 0.1126 |
| Treatment (Placebo vs PG)                                      | 1.969  | 0.1908 | 0.3098 |
| Multiple comparison                                            |        |        |        |
| Placebo (1 <sup>st</sup> test vs 2 <sup>nd</sup> test)         |        | 0.4270 |        |
| Panax ginseng (1 <sup>st</sup> test vs 2 <sup>nd</sup> test)   |        | 0.4618 |        |
| First test (Placebo vs PG)                                     |        | 0.2463 |        |
| Second test (Placebo vs PG)                                    |        | 0.2656 |        |
|                                                                |        |        |        |
| <i>Placebo</i>                                                 |        |        |        |
| Time (Pre – post test)                                         | 2.724  | 0.1298 | 0.2141 |
| Sub-maximal aerobic test (1 <sup>st</sup> vs 2 <sup>nd</sup> ) | 0.2306 | 0.6414 | 0.0503 |
| Multiple comparison                                            |        |        |        |
| Pre-test (1 <sup>st</sup> vs 2 <sup>nd</sup> )                 |        | 0.9314 |        |
| Post-test (1 <sup>st</sup> vs 2 <sup>nd</sup> test)            |        | 0.4832 |        |
| Pre-post test (1 <sup>st</sup> test)                           |        | 0.1476 |        |
| Pre-post test (2 <sup>nd</sup> test)                           |        | 0.4622 |        |
|                                                                |        |        |        |
| <i>Panax ginseng</i>                                           |        |        |        |
| Time (Pre – post test)                                         | 0.6389 | 0.4385 | 0.0469 |
| Sub-maximal aerobic test (1 <sup>st</sup> vs 2 <sup>nd</sup> ) | 0.9457 | 0.3486 | 0.6018 |
| Multiple comparison                                            |        |        |        |
| Pre-test (1 <sup>st</sup> vs 2 <sup>nd</sup> )                 |        | 0.4449 |        |
| Post-test (1 <sup>st</sup> vs 2 <sup>nd</sup> test)            |        | 0.2713 |        |
| Pre-post test (1 <sup>st</sup> test)                           |        | 0.2250 |        |
| Pre-post test (2 <sup>nd</sup> test)                           |        | 0.9935 |        |
|                                                                |        |        |        |
| <b>P. IL-8</b>                                                 |        |        |        |
| <i>Before Sub-maximal aerobic test</i>                         |        |        |        |
| Time (1 <sup>st</sup> test vs 2 <sup>nd</sup> test)            | 0.8066 | 0.3833 | 0.0510 |
| Treatment (Placebo vs PG)                                      | 0.0063 | 0.9378 | 0.0031 |
| Multiple comparison                                            |        |        |        |
| Placebo (1 <sup>st</sup> test vs 2 <sup>nd</sup> test)         |        | 0.4535 |        |
| Panax ginseng (1 <sup>st</sup> test vs 2 <sup>nd</sup> test)   |        | 0.6453 |        |
| First test (Placebo vs PG)                                     |        | 0.8489 |        |
| Second test (Placebo vs PG)                                    |        | 0.9658 |        |
|                                                                |        |        |        |
| <i>After Sub-maximal aerobic test</i>                          |        |        |        |
| Time (1 <sup>st</sup> test vs 2 <sup>nd</sup> test)            | 0.0462 | 0.8328 | 0.0031 |
| Treatment (Placebo vs PG)                                      | 0.7412 | 0.4028 | 0.2442 |
| Multiple comparison                                            |        |        |        |
| Placebo (1 <sup>st</sup> test vs 2 <sup>nd</sup> test)         |        | 0.8307 |        |
| Panax ginseng (1 <sup>st</sup> test vs 2 <sup>nd</sup> test)   |        | 0.9475 |        |
| First test (Placebo vs PG)                                     |        | 0.4576 |        |
| Second test (Placebo vs PG)                                    |        | 0.4015 |        |
|                                                                |        |        |        |
| <i>Placebo</i>                                                 |        |        |        |
| Time (Pre – post test)                                         | 3.950  | 0.0723 | 0.2642 |

|                                                                |        |        |        |
|----------------------------------------------------------------|--------|--------|--------|
| Sub-maximal aerobic test (1 <sup>st</sup> vs 2 <sup>nd</sup> ) | 0.1300 | 0.7252 | 0.0647 |
| Multiple comparison                                            |        |        |        |
| Pre-test (1 <sup>st</sup> vs 2 <sup>nd</sup> )                 |        | 0.7136 |        |
| Post-test (1 <sup>st</sup> vs 2 <sup>nd</sup> test)            |        | 0.7710 |        |
| Pre-post test (1 <sup>st</sup> test)                           |        | 0.1825 |        |
| Pre-post test (2 <sup>nd</sup> test)                           |        | 0.1924 |        |
|                                                                |        |        |        |
| <i>Panax ginseng</i>                                           |        |        |        |
| Time (Pre – post test)                                         | 3.030  | 0.0971 | 0.1316 |
| Sub-maximal aerobic test (1 <sup>st</sup> vs 2 <sup>nd</sup> ) | 0.0083 | 0.9285 | 0.0025 |
| Multiple comparison                                            |        |        |        |
| Pre-test (1 <sup>st</sup> vs 2 <sup>nd</sup> )                 |        | 0.8342 |        |
| Post-test (1 <sup>st</sup> vs 2 <sup>nd</sup> test)            |        | 0.9666 |        |
| Pre-post test (1 <sup>st</sup> test)                           |        | 0.3327 |        |
| Pre-post test (2 <sup>nd</sup> test)                           |        | 0.1574 |        |
|                                                                |        |        |        |
| <b>Q. IL-10</b>                                                |        |        |        |
| <i>Before Sub-maximal aerobic test</i>                         |        |        |        |
| Time (1 <sup>st</sup> test vs 2 <sup>nd</sup> test)            | 0.0167 | 0.8991 | 0.0013 |
| Treatment (Placebo vs PG)                                      | 0.2379 | 0.6339 | 0.0459 |
| Multiple comparison                                            |        |        |        |
| Placebo (1 <sup>st</sup> test vs 2 <sup>nd</sup> test)         |        | 0.4236 |        |
| Panax ginseng (1 <sup>st</sup> test vs 2 <sup>nd</sup> test)   |        | 0.4339 |        |
| First test (Placebo vs PG)                                     |        | 0.3176 |        |
| Second test (Placebo vs PG)                                    |        | 0.8518 |        |
|                                                                |        |        |        |
| <i>After Sub-maximal aerobic test</i>                          |        |        |        |
| Time (1 <sup>st</sup> test vs 2 <sup>nd</sup> test)            | 0.1180 | 0.7367 | 0.0090 |
| Treatment (Placebo vs PG)                                      | 0.1434 | 0.7111 | 0.0274 |
| Multiple comparison                                            |        |        |        |
| Placebo (1 <sup>st</sup> test vs 2 <sup>nd</sup> test)         |        | 0.6454 |        |
| Panax ginseng (1 <sup>st</sup> test vs 2 <sup>nd</sup> test)   |        | 0.9736 |        |
| First test (Placebo vs PG)                                     |        | 0.9084 |        |
| Second test (Placebo vs PG)                                    |        | 0.6035 |        |
|                                                                |        |        |        |
| <i>Placebo</i>                                                 |        |        |        |
| Time (Pre – post test)                                         | 5.516  | 0.0443 | 0.3191 |
| Sub-maximal aerobic test (1 <sup>st</sup> vs 2 <sup>nd</sup> ) | 1.207  | 0.2954 | 0.1551 |
| Multiple comparison                                            |        |        |        |
| Pre-test (1 <sup>st</sup> vs 2 <sup>nd</sup> )                 |        | 0.1189 |        |
| Post-test (1 <sup>st</sup> vs 2 <sup>nd</sup> test)            |        | 0.1546 |        |
| Pre-post test (1 <sup>st</sup> test)                           |        | 0.3854 |        |
| Pre-post test (2 <sup>nd</sup> test)                           |        | 0.4031 |        |
|                                                                |        |        |        |
| <i>Panax ginseng</i>                                           |        |        |        |
| Time (Pre – post test)                                         | 7.370  | 0.0147 | 0.3024 |
| Sub-maximal aerobic test (1 <sup>st</sup> vs 2 <sup>nd</sup> ) | 0.0057 | 0.9408 | 0.0064 |
| Multiple comparison                                            |        |        |        |
| Pre-test (1 <sup>st</sup> vs 2 <sup>nd</sup> )                 |        | 0.8591 |        |
| Post-test (1 <sup>st</sup> vs 2 <sup>nd</sup> test)            |        | 0.7465 |        |
| Pre-post test (1 <sup>st</sup> test)                           |        | 0.2687 |        |
| Pre-post test (2 <sup>nd</sup> test)                           |        | 0.0166 |        |
|                                                                |        |        |        |
| <b>R. TNF<math>\alpha</math></b>                               |        |        |        |
| <i>Before Sub-maximal aerobic test</i>                         |        |        |        |

|                                                                |        |        |        |
|----------------------------------------------------------------|--------|--------|--------|
| Time (1 <sup>st</sup> test vs 2 <sup>nd</sup> test)            | 0.1616 | 0.6937 | 0.0114 |
| Treatment (Placebo vs PG)                                      | 0.0262 | 0.8737 | 0.0103 |
| Multiple comparison                                            |        |        |        |
| Placebo (1 <sup>st</sup> test vs 2 <sup>nd</sup> test)         |        | 0.8788 |        |
| Panax ginseng (1 <sup>st</sup> test vs 2 <sup>nd</sup> test)   |        | 0.6554 |        |
| First test (Placebo vs PG)                                     |        | 0.8350 |        |
| Second test (Placebo vs PG)                                    |        | 0.9306 |        |
|                                                                |        |        |        |
| <i>After Sub-maximal aerobic test</i>                          |        |        |        |
| Time (1 <sup>st</sup> test vs 2 <sup>nd</sup> test)            | 1.549  | 0.2337 | 0.0996 |
| Treatment (Placebo vs PG)                                      | 1.979  | 0.1813 | 0.2146 |
| Multiple comparison                                            |        |        |        |
| Placebo (1 <sup>st</sup> test vs 2 <sup>nd</sup> test)         |        | 0.0888 |        |
| Panax ginseng (1 <sup>st</sup> test vs 2 <sup>nd</sup> test)   |        | 0.7474 |        |
| First test (Placebo vs PG)                                     |        | 0.0445 |        |
| Second test (Placebo vs PG)                                    |        | 0.8580 |        |
|                                                                |        |        |        |
| <i>Placebo</i>                                                 |        |        |        |
| Time (Pre – post test)                                         | 6.264  | 0.0294 | 0.3629 |
| Sub-maximal aerobic test (1 <sup>st</sup> vs 2 <sup>nd</sup> ) | 1.896  | 0.1959 | 0.2297 |
| Multiple comparison                                            |        |        |        |
| Pre-test (1 <sup>st</sup> vs 2 <sup>nd</sup> )                 |        | 0.9286 |        |
| Post-test (1 <sup>st</sup> vs 2 <sup>nd</sup> test)            |        | 0.0476 |        |
| Pre-post test (1 <sup>st</sup> test)                           |        | 0.0108 |        |
| Pre-post test (2 <sup>nd</sup> test)                           |        | 0.5779 |        |
|                                                                |        |        |        |
| <i>Panax ginseng</i>                                           |        |        |        |
| Time (Pre – post test)                                         | 3.154  | 0.0917 | 0.1424 |
| Sub-maximal aerobic test (1 <sup>st</sup> vs 2 <sup>nd</sup> ) | 0.0202 | 0.8885 | 0.0169 |
| Multiple comparison                                            |        |        |        |
| Pre-test (1 <sup>st</sup> vs 2 <sup>nd</sup> )                 |        | 0.9147 |        |
| Post-test (1 <sup>st</sup> vs 2 <sup>nd</sup> test)            |        | 0.8675 |        |
| Pre-post test (1 <sup>st</sup> test)                           |        | 0.2464 |        |
| Pre-post test (2 <sup>nd</sup> test)                           |        | 0.2048 |        |
